# Supplementary material for: MOTS-c modulates skeletal muscle function by directly binding and activating CK2
Source: PubMed Central journal article supplement (PMC11570452; doi:10.1016/j.isci.2024.111212), 2024-10-19
Supplement: mmc1.pdf [file mmc1.pdf]

## **Supplemental information**

### **MOTS-c modulates skeletal muscle function by directly binding and activating CK2**

**Hiroshi Kumagai, Su-Jeong Kim, Brendan Miller, Hirofumi Zempo, Kumpei Tanisawa, Toshiharu Natsume, Shin Hyung Lee, Junxiang Wan, Naphada Leelaprachakul, Michi Emma Kumagai, Ricardo Ramirez II, Hemal H. Mehta, Kevin Cao, Tae Jung Oh, James A. Wohlschlegel, Jihui Sha, Yuichiro Nishida, Noriyuki Fuku, Shohei Dobashi, Eri Miyamoto-Mikami, Mizuki Takaragawa, Mizuho Fuku, Toshinori Yoshihara, Hisashi Naito, Ryoko Kawakami, Suguru Torii, Taishi Midorikawa, Koichiro Oka, Megumi Hara, Chiharu Iwasaka, Yosuke Yamada, Yasuki Higaki, Keitaro Tanaka, Kelvin Yen, and Pinchas Cohen**

## **MOTS-c modulates skeletal muscle function by directly binding and activating CK2**

Hiroshi Kumagai<sup>1</sup>), Su-Jeong Kim<sup>1</sup>), Brendan Miller<sup>1</sup>), Hirofumi Zempo<sup>2</sup>), Kumpei Tanisawa<sup>3</sup>), Toshiharu Natsume<sup>4</sup>), Shin Hyung Lee<sup>1</sup>), Junxiang Wan<sup>1</sup>), Naphada Leelaprachakul<sup>1</sup>), Michi Emma Kumagai<sup>1,5</sup>), Ricardo Ramirez II<sup>1</sup>), Hemal H. Mehta<sup>1</sup>), Kevin Cao<sup>1</sup>), Tae Jung Oh<sup>1,6</sup>), James A Wohlschlegel<sup>7</sup>), Jihui Sha<sup>7</sup>), Yuichiro Nishida<sup>8</sup>), Noriyuki Fuku<sup>9</sup>), Shohei Dobashi<sup>10</sup>), Eri Miyamoto-Mikami<sup>9</sup>), Mizuki Takaragawa<sup>9</sup>), Mizuho Fuku<sup>9,11</sup>), Toshinori Yoshihara<sup>9</sup>), Hisashi Naito<sup>9</sup>), Ryoko Kawakami<sup>12</sup>), Suguru Torii<sup>3</sup>), Taishi Midorikawa<sup>13</sup>), Koichiro Oka<sup>3</sup>), Megumi Hara<sup>8</sup>), Chiharu Iwasaka<sup>14</sup>), Yosuke Yamada<sup>14</sup>), Yasuki Higaki<sup>15</sup>), Keitaro Tanaka<sup>8</sup>), Kelvin Yen<sup>1</sup>), Pinchas Cohen<sup>1</sup>\*

- 1) The Leonard Davis School of Gerontology, University of Southern California, California, USA
- 2) Department of Administrative Nutrition, Faculty of Health and Nutrition, Tokyo Seiei College, Tokyo, Japan
- 3) Faculty of Sport Sciences, Waseda University, Saitama, Japan
- 4) Faculty of Medicine, Tokai University, Kanagawa, Japan
- 5) Department of Psychiatry, David Geffen School of Medicine, University of California, Los Angeles, California, USA
- 6) Department of Internal Medicine, Seoul National University College of Medicine, Seoul, Korea
- 7) Department of Biological Chemistry, University of California, Los Angeles, California, USA.
- 8) Department of Preventive Medicine, Faculty of Medicine, Saga University, Saga, Japan
- 9) Graduate School of Health and Sports Science, Juntendo University, Chiba, Japan.
- 10) Institute of Health and Sport Sciences, University of Tsukuba, Ibaraki, Japan
- 11) Tsudanuma Central General Hospital, Chiba, Japan
- 12) Physical Fitness Research Institute, Meiji Yasuda Life Foundation of Health and Welfare, Tokyo, Japan
- 13) College of Health and Welfare, J.F. Oberlin University, Tokyo, Japan
- 14) Department of Physical Activity Research, National Institutes of Biomedical Innovation, Health and Nutrition, Osaka, Japan
- 15) Laboratory of Exercise Physiology, Faculty of Sports and Health Science, Fukuoka University, Fukuoka, Japan

\*Corresponding author. Email: [hassy@usc.edu](mailto:hassy@usc.edu)

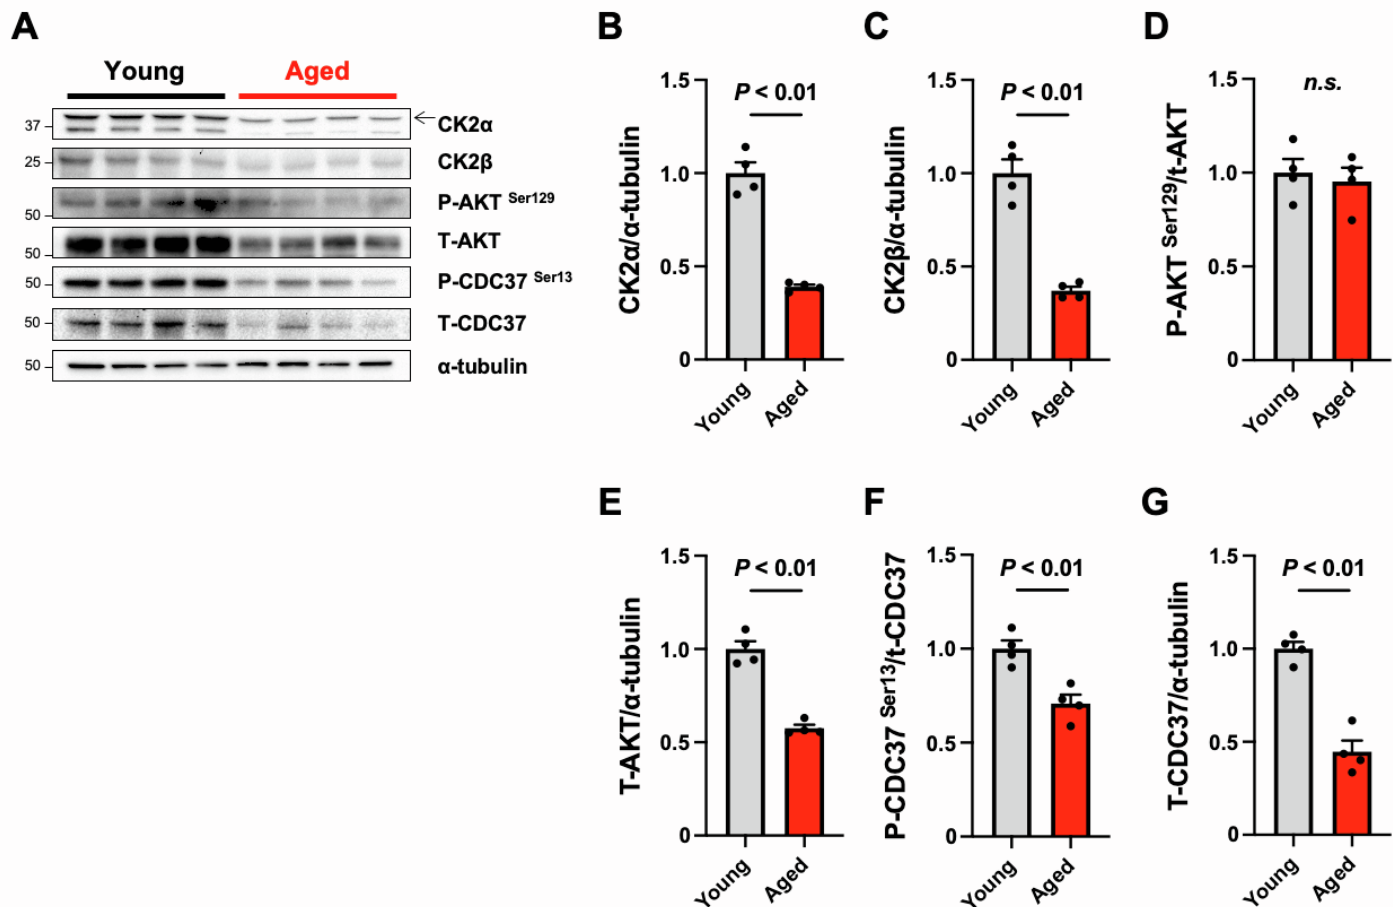

**Supplemental-Figure 1. Expression levels of CK2 $\alpha$ , CK2 $\beta$ , and direct substrates of CK2 in young and aged mice.**

(A): Western blot images of the analyzed proteins in young (2 months) and aged (22 months) mice (n = 4 per group). (B-G): Quantification of CK2 $\alpha$ / $\alpha$ -tubulin (B), CK2 $\beta$ / $\alpha$ -tubulin (C), pAKT Ser129/total AKT (D), total AKT/ $\alpha$ -tubulin (E), pCDC37 Ser13/total CDC37 (F), and total CDC37/ $\alpha$ -tubulin fat (G).

Data are represented as mean +/- SEM.

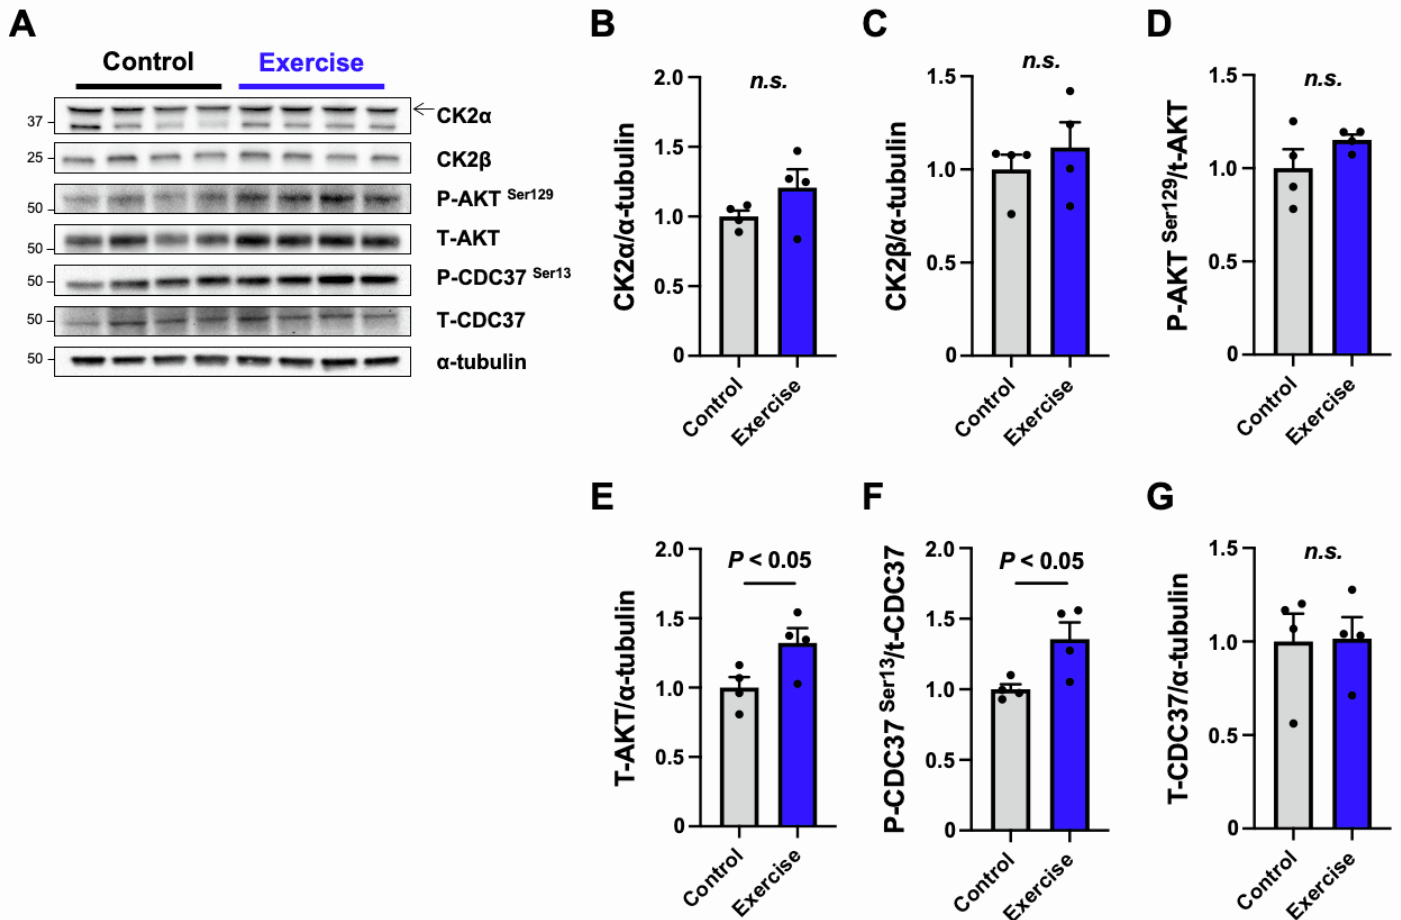

**Supplemental-Figure 2. Expression levels of CK2 $\alpha$ , CK2 $\beta$ , and direct substrates of CK2 in sedentary and exercised young mice.**

(A): Western blot images of the analyzed proteins in sedentary and exercise trained mice (n = 4 per group). Mice in exercise training group were housed in cages with running wheels for 4 weeks. (B-G): Quantification of CK2 $\alpha$ / $\alpha$ -tubulin (B), CK2 $\beta$ / $\alpha$ -tubulin (C), pAKT Ser129/total AKT (D), total AKT/ $\alpha$ -tubulin (E), pCDC37 Ser13/total CDC37 (F), and total CDC37/ $\alpha$ -tubulin (G).

Data are represented as mean +/- SEM.

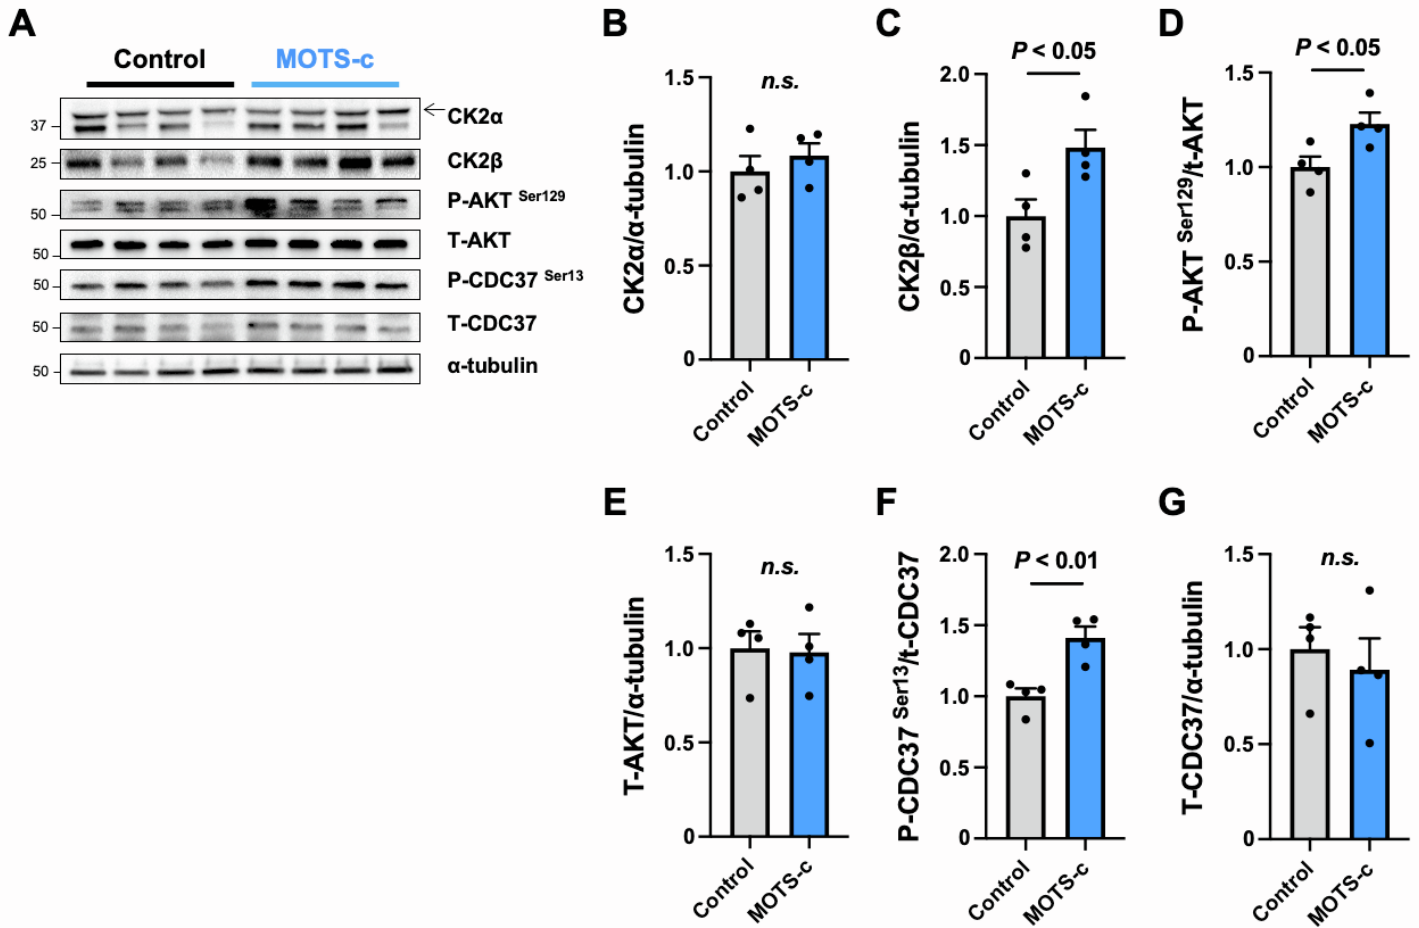

**Supplemental-Figure 3. Expression levels of CK2 $\alpha$ , CK2 $\beta$ , and direct substrates of CK2 in control and MOT5-c treated high-fat diet-fed (HFD) mice.**

(A): Western blot images of the analyzed proteins in control and MOT5-c treated HFD-fed mice (n = 4 per group). MOT5-c was administered by IP injection twice a day for 8 weeks (5 mg/kg/day). (B-G): Quantification of CK2 $\alpha$ / $\alpha$ -tubulin (B), CK2 $\beta$ / $\alpha$ -tubulin (C), pAKT Ser129/total AKT (D), total AKT/ $\alpha$ -tubulin (E), pCDC37 Ser13/total CDC37 (F), and total CDC37/ $\alpha$ -tubulin (G).

Data are represented as mean +/- SEM.

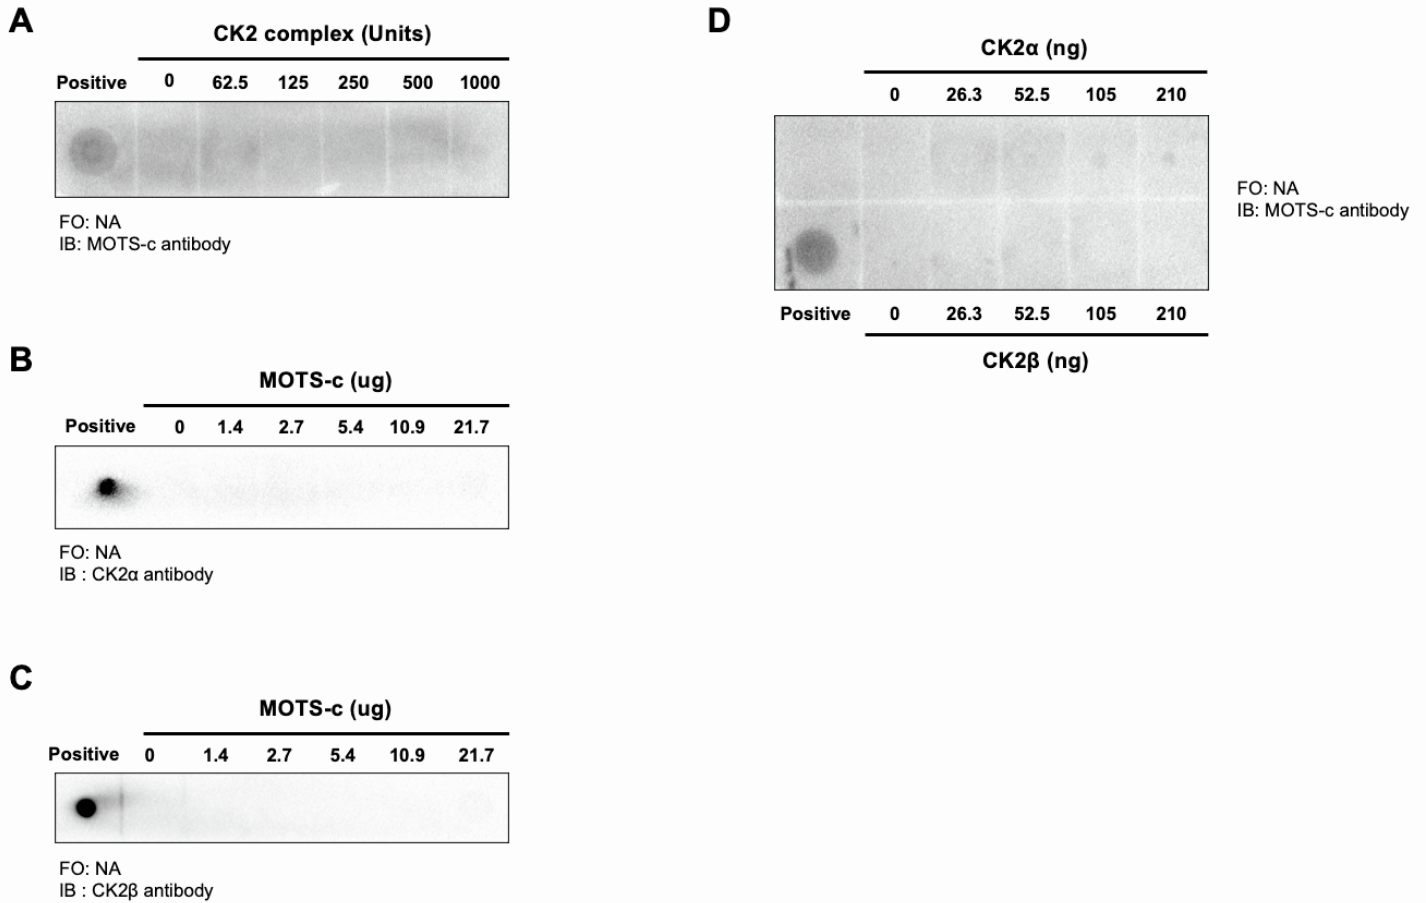

**Supplemental-Figure 4. Dot blot images for assay controls.**

(A-C): Dot blot assays with (A) CK2 complex (contains both CK2 $\alpha$  and CK2 $\beta$  subunits) immobilized, flowed over the membrane without MOTS-c, and detected by MOTS-c antibody, (B-C): MOTS-c immobilized, flowed over the membrane without CK2 complex, and detected by CK2 $\alpha$  (B) and CK2 $\beta$  (C) antibodies. (D): CK2 $\alpha$  or CK2 $\beta$  immobilized, flowed over the membrane without MOTS-c, and detected by MOTS-c antibody. FO: flow over, IB: immunoblotting.

Positive controls: MOTS-c (1085 ng), CK2 $\alpha$  (420 ng), and CK2 $\beta$  (200 ng).

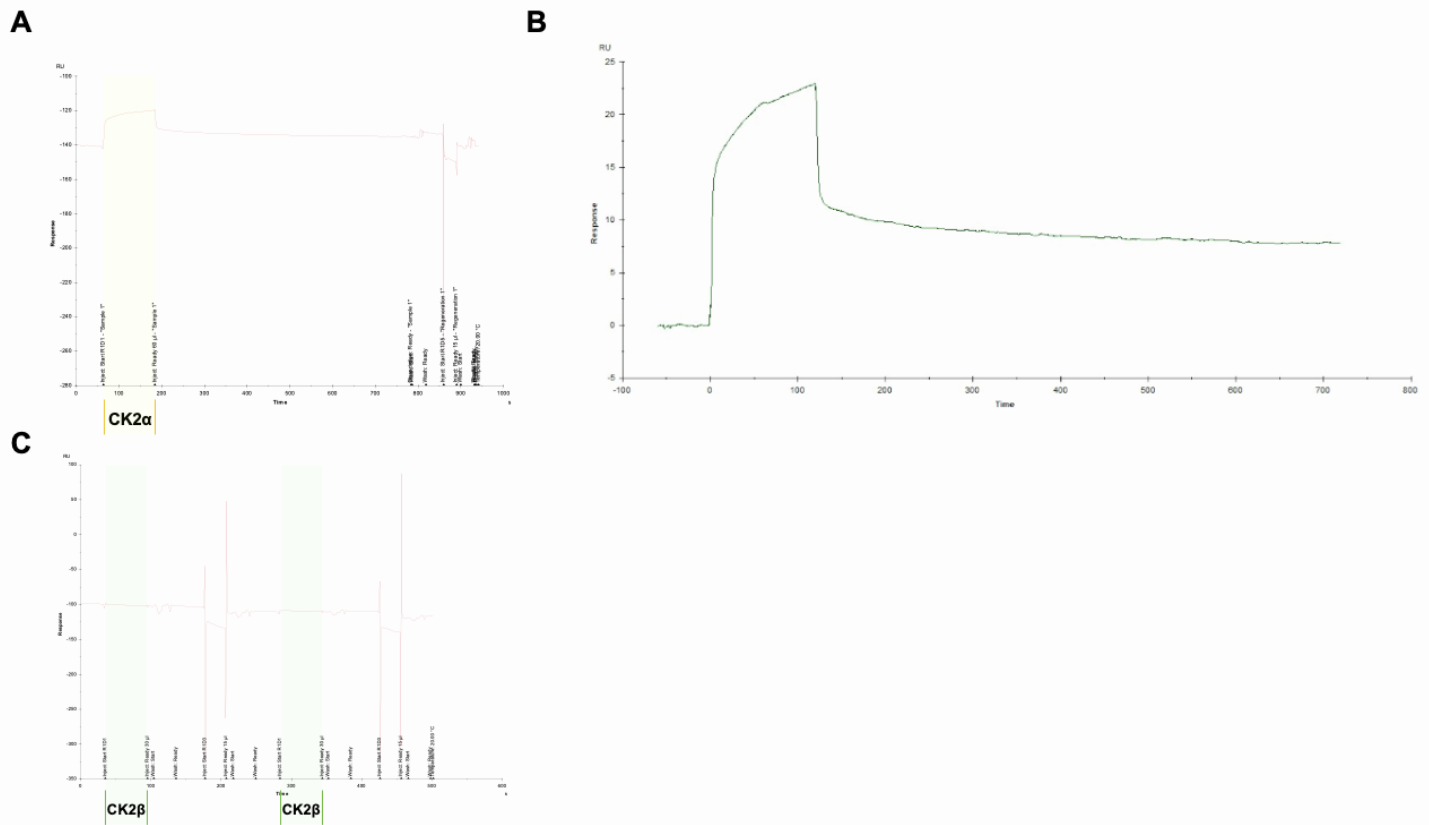

### Supplemental-Figure 5. Surface plasmon resonance assay of MOTS-c and CK2 subunits

(A): Raw signal data of the surface plasmon resonance assay of MOTS-c and CK2 $\alpha$  subunit. Running buffer flowed first, then CK2 $\alpha$  (70 nM) flowed during the yellow highlighted period. (B): Binding signal between MOTS-c and CK2 $\alpha$  subtracted by the negative control signal. (C): Raw signal data of the surface plasmon resonance assay of MOTS-c and CK2 $\beta$  subunit. Running buffer flowed first, then CK2 $\beta$  (70 nM) flowed during the green highlighted period. CK2 $\beta$  flowed twice to confirm no binding.

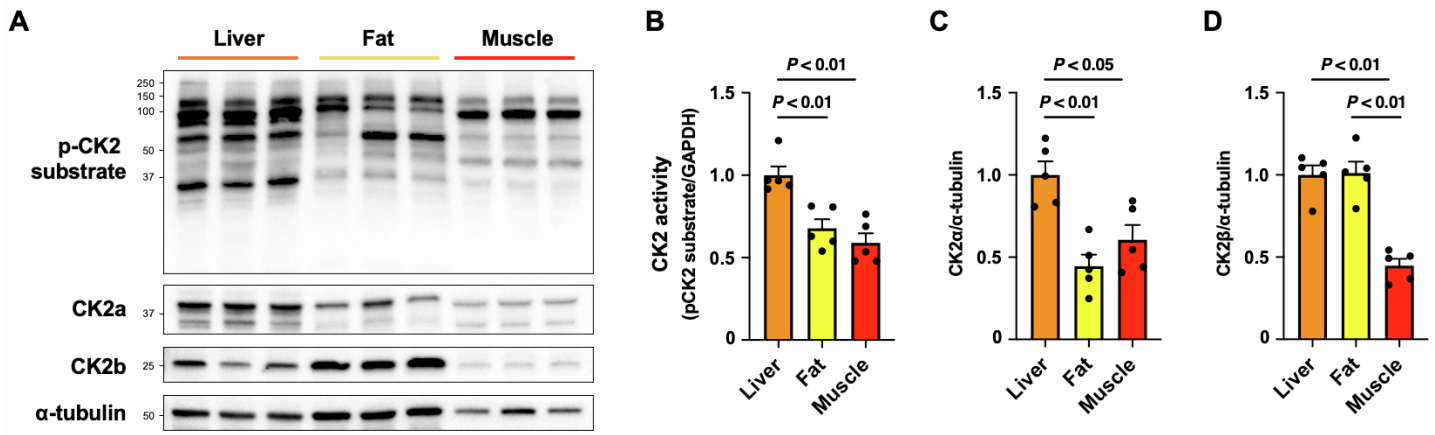

**Supplemental-Figure 6. Comparison of CK2 activity and expression levels of CK2 subunits in liver, epididymal fat, and gastrocnemius muscle.**

(A): Expression levels of phosphor-CK2 substrate, CK2 $\alpha$ , and CK2 $\beta$  in liver, epididymal fat, and gastrocnemius muscle in young mice (n = 5). (B-D): Quantifications of CK2 activity assessed by detecting phosphor-CK2 substrate, CK2 $\alpha$ , and CK2 $\beta$  in liver, epididymal fat, and gastrocnemius muscle.

Data are represented as mean +/- SEM.



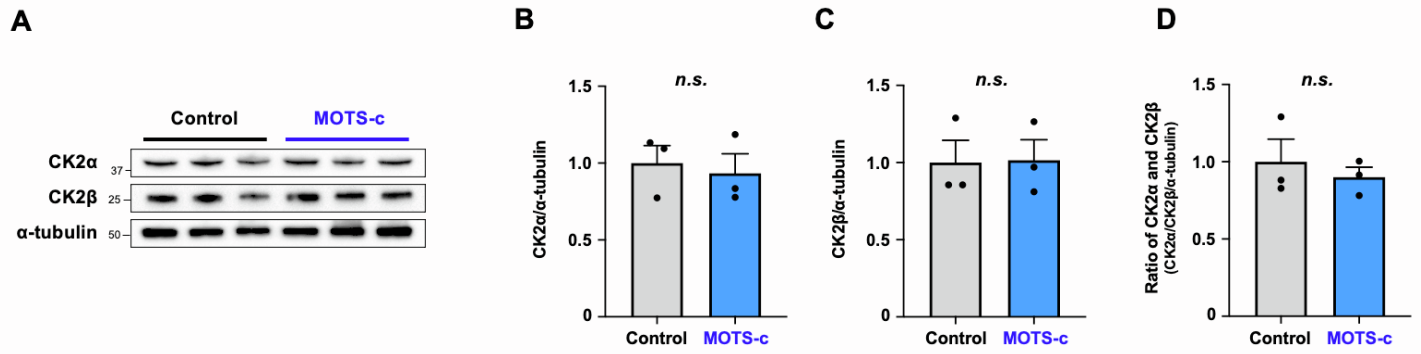

**Supplemental-Figure 7. Effect of a single MOTS-c administration on CK2α and CK2β expression levels in gastrocnemius muscle.**

**(A):** Western blot images of CK2α and CK2β in control and MOTS-c administered young mice (n = 3 per group). MOTS-c was administered by IP injection (7.5 mg/kg) 30 minutes before tissue collection. **(B-D):** Quantifications of CK2α and CK2β in gastrocnemius muscle.

Data are represented as mean +/- SEM.

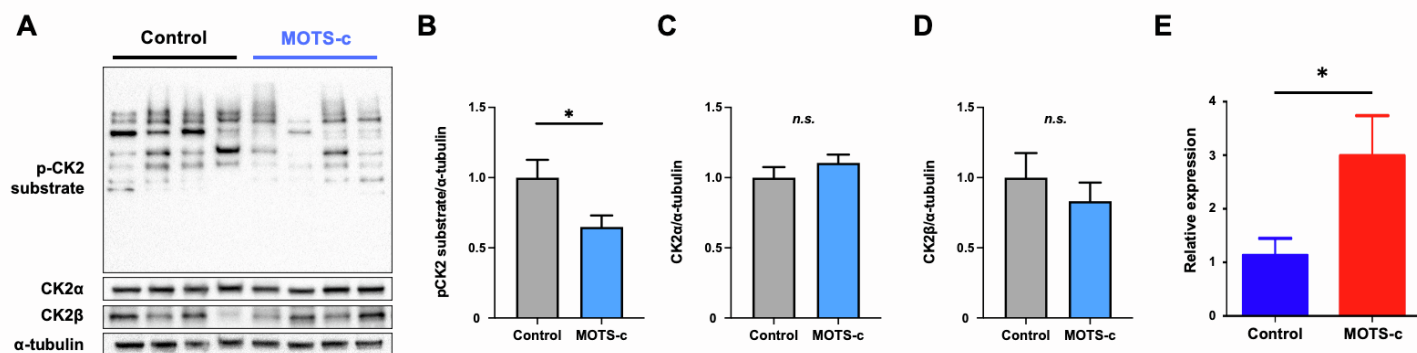

### Supplemental-Figure 8. Effect of 8 weeks of MOTS-c treatment on CK2 in epididymal fat

**(A-B)**: Western blot images of phospho-CK2 substrate as an index of CK2 activity, CK2 $\alpha$ , and CK2 $\beta$  expression levels in epididymal fat. **(B-D)**: Quantification of phospho-CK2 substrate as an index of CK2 activity, CK2 $\alpha$ , and CK2 $\beta$  expression levels in epididymal fat. **(E)**: Expression levels of UCP1 mRNA in epididymal fat.

Data are represented as mean  $\pm$  SEM.

\*:  $P < 0.05$ .

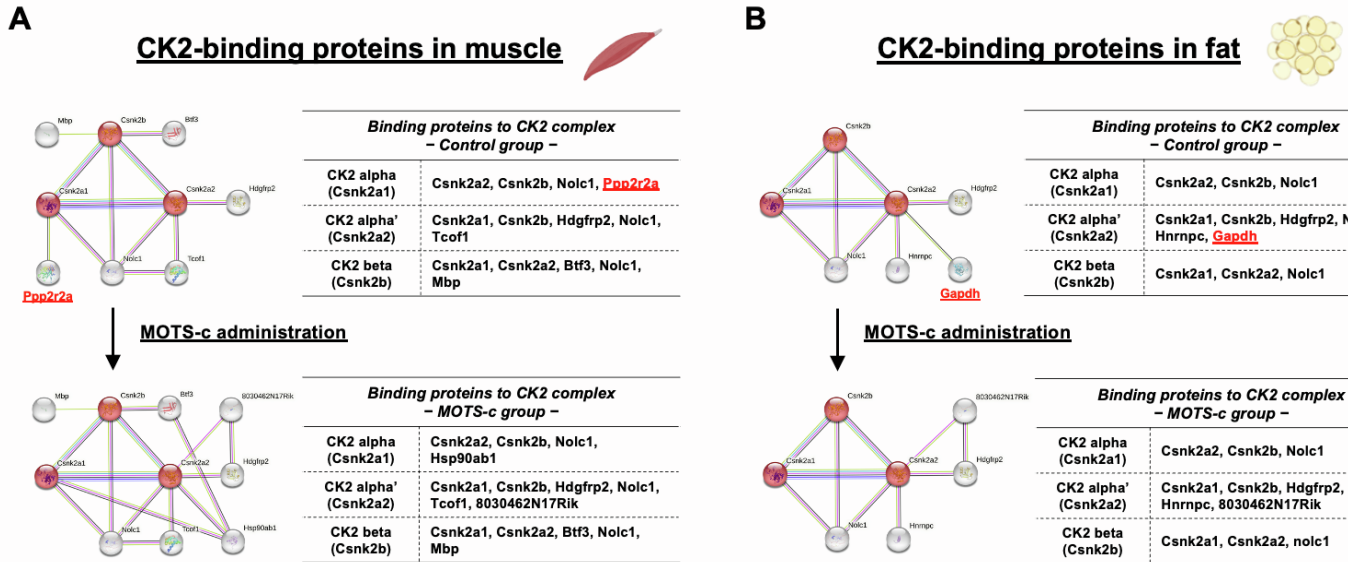

**Supplemental-Figure 9. Direct interacting proteins with the MOTS-c/CK2 complex**

(A-B): Direct interacting proteins with the MOTS-c/CK2 complex in gastrocnemius muscle (A) and epididymal fat (B) in control and MOTS-c administered mice. MOTS-c was administered by IP injection (7.5 mg/kg) 30 minutes before the tissue collection. The direct interacting proteins were analyzed by using the STRING database.

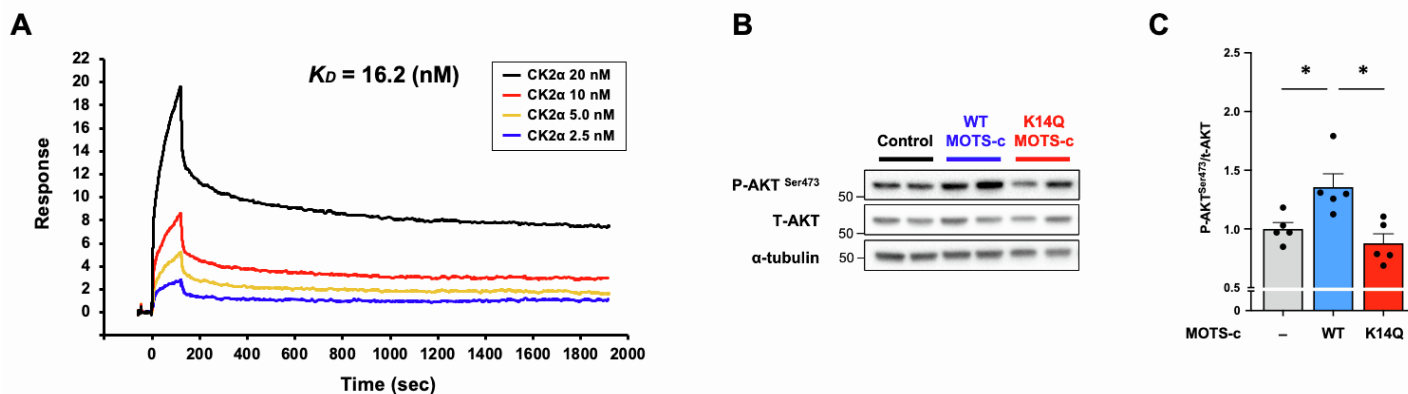

### Supplemental-Figure 10. K14Q MOTS-c is a bio-inactive form of MOTS-c

(A): Surface plasmon resonance (Biacore assay) of K14Q MOTS-c (10  $\mu$ g/ml) and CK2 $\alpha$  (2.5 nM, 5.0 nM, 10 nM, and 20 nM). K14Q MOTS-c was immobilized on the sensor chip and CK2 $\alpha$  flowed over the sensor chip.  $K_D$ : dissociation constant. (B-C): Western blot result of phosphor-AKT Ser473 in WT MOTS-c and K14Q MOTS-c administered (2.5 mg/kg) mouse gastrocnemius muscles. MOTS-c was administered by IP injection 30 minutes before the tissue collection.

Data are represented as mean  $\pm$  SEM.

\*:  $P < 0.05$ .

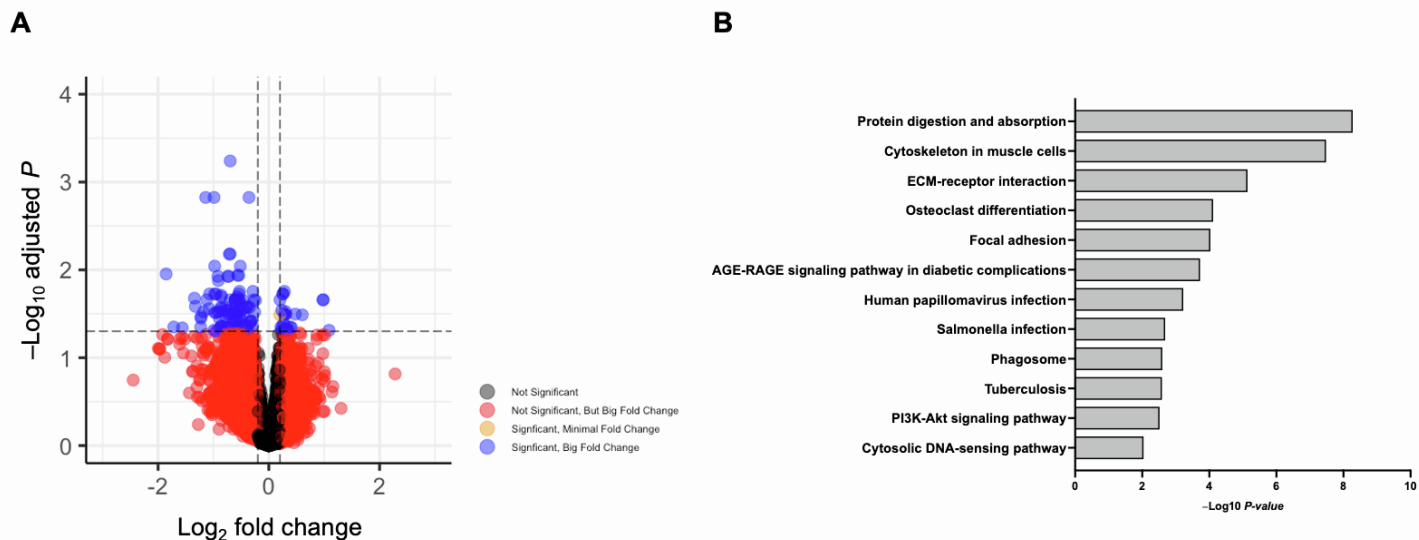

**Supplemental-Figure 11. Skeletal muscle RNA sequencing in gastrocnemius muscles from WT or K14Q MOTS-c treated immobilized mice**

**(A):** Differentially expressed genes between WT and K14Q MOTS-c treated mouse gastrocnemius muscles. Mice were immobilized for 8 days with WT or K14Q MOTS-c treatment. WT or K14Q MOTS-c was administered by IP injection twice a day (15 mg/kg/day). **(B):** Significant enriched KEGG pathways between WT and K14Q MOTS-c treated mouse gastrocnemius muscles.

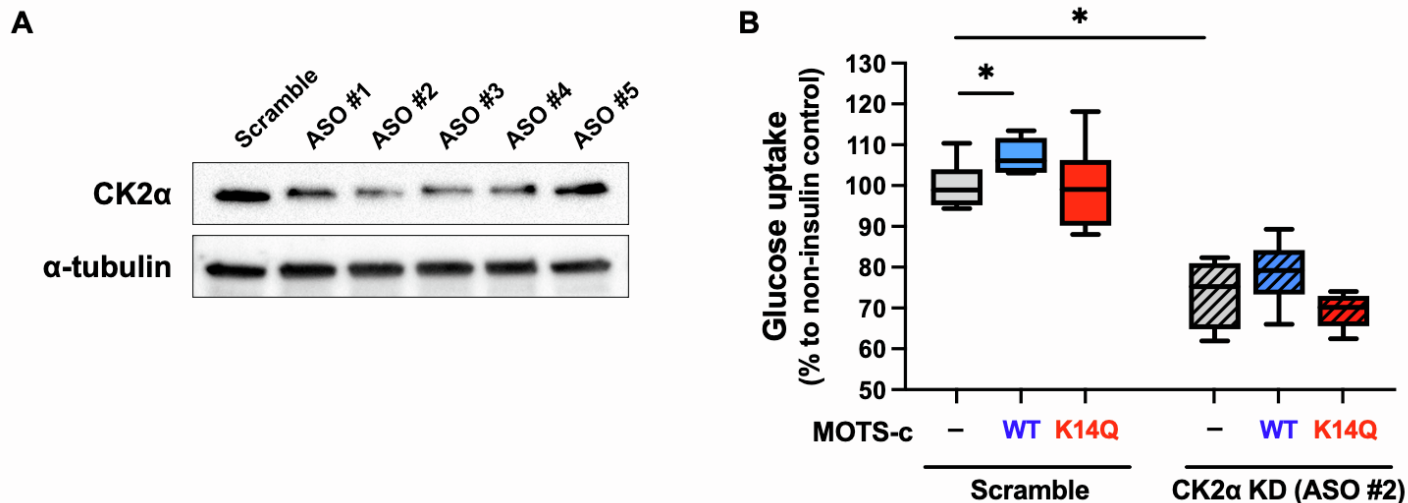

**Supplemental-Figure 12. MOTS-c induced glucose uptake in differentiated human skeletal muscle cells with/without CK2  $\alpha$  knockdown (KD).**

(A): Western blot image of CK2  $\alpha$  expression by in 5 different AUM*silence* ASO targeting CK2 $\alpha$  and scramble control. Differentiated human skeletal muscle cells were incubated with each ASO (5  $\mu$ M) for 48h for CK2 $\alpha$  KD. (B): 2-deoxyglucose (2-DG) uptake with/without CK2 $\alpha$  KD in differentiated human skeletal muscle cells. The differentiated human skeletal muscle cells were incubated with scramble or ASO #2 (5  $\mu$ M) for 24h to knockdown CK2 $\alpha$ . Then, the cells were treated with insulin (1  $\mu$ M), and WT or K14Q MOTS-c (10  $\mu$ M) for 15 minutes, followed by 2DG uptake assay.

ASO: antisense oligonucleotide.

Data are represented as median and min to max.

\*:  $P < 0.05$ .

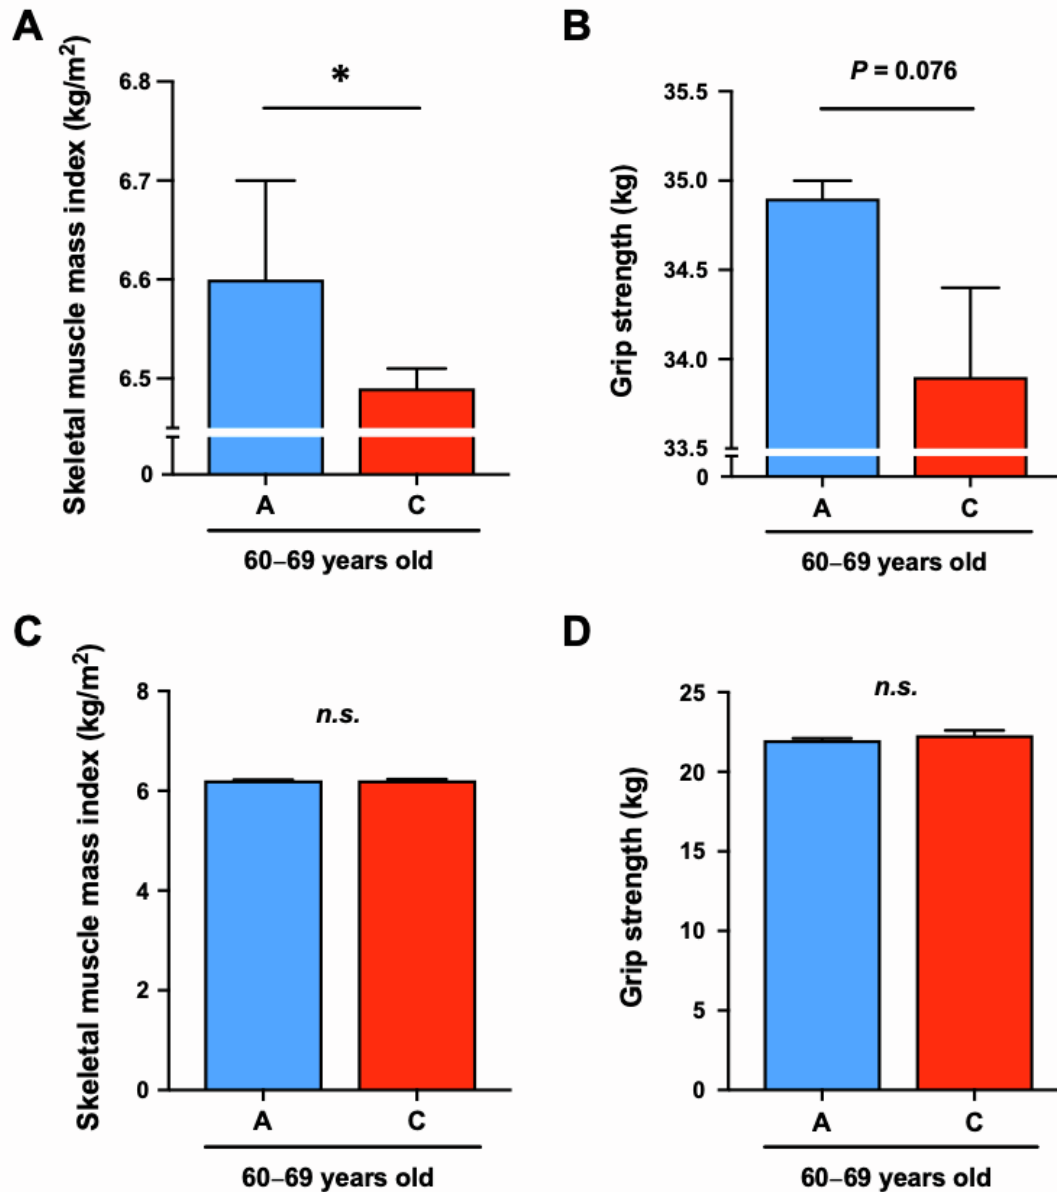

**Supplemental-Figure 13. The bio-inactive K14Q MOTS-c decreases skeletal muscle mass index and muscle strength in aged population**

(A-B): Skeletal muscle mass index (A and C) and grip strength (B and D) between the A allele and C allele carriers of m.1382A>C polymorphism in the aged males (A-B) and females (C-D). The studied male subjects were from J-MICC 2<sup>nd</sup> study. The sample size for skeletal muscle mass index and grip strength were 8,132 and 8226, respectively.

Data are represented as mean +/- SEM.

\*:  $P < 0.05$ .

**Supplemental-Table 9. List of differentially expressed proteins bind to CK2 $\alpha$  between distilled water- and MOTS-c-administered mouse skeletal muscle**

| Protein ID | Gene symbol | Protein Name                                            | iLog2FC     | iPvalue   |
|------------|-------------|---------------------------------------------------------|-------------|-----------|
| P21107     | Tpm3        | tropomyosin 3, gamma                                    | 7.192069042 | 0.0174315 |
| P28798     | P28798      | NA                                                      | 4.540608767 | 0.0325498 |
| P47754     | Capza2      | capping protein (actin filament) muscle Z-line, alpha 2 | 4.509815656 | 0.0318659 |
| P58774     | Tpm2        | tropomyosin 2, beta                                     | 4.141239228 | 0.0250031 |
| Q9D0R8     | Lsm12       | LSM12 homolog                                           | 4.058109575 | 0.0261857 |
| Q8K4P0     | Wdr33       | WD repeat domain 33                                     | 3.702798176 | 0.0345665 |
| O55126     | O55126      | NA                                                      | 3.346322717 | 0.0113196 |
| P97443     | Smyd1       | SET and MYND domain containing 1                        | 3.29055197  | 0.0285672 |
| P47757     | Capzb       | capping protein (actin filament) muscle Z-line, beta    | 3.244881991 | 0.0148672 |
| A0A0B4J1K5 | A0A0B4J1K5  | NA                                                      | 3.154180022 | 0.0351659 |
| P09542     | Myl3        | myosin, light polypeptide 3                             | 3.046810962 | 0.0160006 |
| Q01149     | Col1a2      | collagen, type I, alpha 2                               | 3.038274028 | 0.0290042 |
| P27573     | Mpz         | myelin protein zero                                     | 2.773730354 | 0.0140203 |
| P83741     | Wnk1        | WNK lysine deficient protein kinase 1                   | 2.750540391 | 0.0327225 |
| P20801     | Tnnc2       | troponin C2, fast                                       | 2.673346188 | 0.0300756 |
| O08638     | O08638      | NA                                                      | 2.66157645  | 0.0177936 |
| E9PWQ3     | E9PWQ3      | NA                                                      | 2.613920042 | 0.0474524 |
| Q70IV5     | Synm        | synemin, intermediate filament protein                  | 2.560987857 | 0.0480641 |
| Q9CQB2     | Mcrip2      | MAPK regulated corepressor interacting protein 2        | 2.456683342 | 0.0278157 |
| Q91WK2     | Eif3h       | eukaryotic translation initiation factor 3, subunit H   | 2.380124869 | 0.0177151 |
| Q05920     | Q05920      | NA                                                      | 2.310135725 | 0.0334907 |



|            |            |                                                       |              |           |
|------------|------------|-------------------------------------------------------|--------------|-----------|
| Q9D1G3     | Hhatl      | hedgehog acyltransferase-like                         | 2.261435557  | 0.0300571 |
| Q5FW52     | Mlip       | muscular LMNA-interacting protein                     | 2.112713449  | 0.0288336 |
| Q8JZQ9     | Eif3b      | eukaryotic translation initiation factor 3, subunit B | 2.079465927  | 0.0279597 |
| Q8VDD5     | Myh9       | myosin, heavy polypeptide 9, non-muscle               | 2.056541792  | 0.0489364 |
| Q02788     | Col6a2     | collagen, type VI, alpha 2                            | 2.036779538  | 0.0270092 |
| A0A075B5T9 | A0A075B5T9 | NA                                                    | 1.742387835  | 0.0323141 |
| Q05793     | Hspg2      | perlecan (heparan sulfate proteoglycan 2)             | 1.711665976  | 0.0190108 |
| P23116     | Eif3a      | eukaryotic translation initiation factor 3, subunit A | 1.634096354  | 0.0324915 |
| P07356     | Anxa2      | annexin A2                                            | 1.594925998  | 0.0133197 |
| P11531     | Dmd        | dystrophin, muscular dystrophy                        | 1.09950916   | 0.0189157 |
| Q9CZ13     | Uqcrc1     | ubiquinol-cytochrome c reductase core protein 1       | -2.451408398 | 0.0486798 |

---

Comparison of skeletal muscle samples with CK2 $\alpha$  immunoprecipitations between distilled water- and MOTS-c administered mice (iPvalue < 0.05).

**Supplemental-Table 10. List of differentially expressed proteins bind to CK2 $\alpha$  between distilled water- and MOTS-c-administered mouse fat**

| Protein ID | Gene symbol   | Protein Name                                                                             | iLog2FC    | iPvalue   |
|------------|---------------|------------------------------------------------------------------------------------------|------------|-----------|
| Q9D2G5     | Synj2         | synaptojanin 2                                                                           | 8.47421072 | 0.02386   |
| Q9D824     | Fip111        | FIP1 like 1 ( <i>S. cerevisiae</i> )                                                     | 7.33678479 | 0.0112188 |
| P98086     | C1qa          | complement component 1, q subcomponent, alpha polypeptide                                | 6.23635549 | 0.0127687 |
| Q60803     | Traf3         | TNF receptor-associated factor 3                                                         | 5.02025413 | 0.0285897 |
| Q8CF66     | Lamtor4       | late endosomal/lysosomal adaptor, MAPK and MTOR activator 4                              | 5.00676528 | 0.0375359 |
| P04945     | P04945        | NA                                                                                       | 4.24843097 | 0.0441293 |
| P41105     | Rpl28         | ribosomal protein L28                                                                    | 4.23120773 | 0.0424605 |
| Q569Z6     | Thrap3        | thyroid hormone receptor associated protein 3                                            | 4.16011256 | 0.0391485 |
| A0A075B5T3 | A0A075B5T3    | NA                                                                                       | 4.15633863 | 0.0293884 |
| A0A075B5X3 | A0A075B5X3    | NA                                                                                       | 3.55559168 | 0.0225436 |
| P56395     | Cyb5a         | cytochrome b5 type A (microsomal)                                                        | 3.40703389 | 0.0145055 |
| P11031     | Sub1          | SUB1 homolog, transcriptional regulator                                                  | 3.40650789 | 0.0461463 |
| A0A075B5M2 | A0A075B5M2    | NA                                                                                       | 3.36905992 | 0.023844  |
| Q8BH50     | 8030462N17Rik | RIKEN cDNA 8030462N17 gene                                                               | 3.28230822 | 0.0115527 |
| Q60870     | Q60870        | NA                                                                                       | 2.95772798 | 0.0364198 |
| A0A0A6YXA5 | A0A0A6YXA5    | NA                                                                                       | 2.92729083 | 0.0291781 |
| Q8QZT1     | Acat1         | acetyl-Coenzyme A acetyltransferase 1                                                    | 2.47663512 | 0.0271226 |
| Q61753     | Phgdh         | 3-phosphoglycerate dehydrogenase                                                         | 2.34621112 | 0.0315172 |
| P62830     | Rpl23         | ribosomal protein L23                                                                    | 2.33112162 | 0.0328309 |
| P11499     | Hsp90ab1      | heat shock protein 90 alpha (cytosolic), class B member 1                                | 2.32483412 | 0.0363328 |
| P61358     | Rpl27         | ribosomal protein L27                                                                    | 2.29098077 | 0.0256708 |
| Q60931     | Vdac3         | voltage-dependent anion channel 3                                                        | 2.26888962 | 0.0493133 |
| P59708     | Sf3b6         | splicing factor 3B, subunit 6                                                            | 2.20544218 | 0.012859  |
| Q8VIJ6     | Sfpq          | splicing factor proline/glutamine rich (polypyrimidine tract binding protein associated) | 2.14556419 | 0.0127245 |
| Q8K310     | Matr3         | matrin 3                                                                                 | 2.01271197 | 0.0135782 |
| A0A075B5Y3 | A0A075B5Y3    | NA                                                                                       | 1.94021358 | 0.0141639 |
| P68254     | Ywhaq         | tyrosine 3-monooxygenase/tryptophan 5-monooxygenase activation protein theta             | 1.84077689 | 0.0388817 |
| A0A075B5Y4 | A0A075B5Y4    | NA                                                                                       | 1.80096261 | 0.0110165 |
| Q02257     | Jup           | junction plakoglobin                                                                     | 1.61024499 | 0.0227959 |
| P17897     | Lyz1          | lysozyme 1                                                                               | 1.30747545 | 0.0360416 |
| Q60854     | Serpinb6a     | serine (or cysteine) peptidase inhibitor, clade B, member 6a                             | 0.99888001 | 0.0344708 |

|            |            |                                                               |            |           |
|------------|------------|---------------------------------------------------------------|------------|-----------|
| O08529     | Capn2      | calpain 2                                                     | -1.227369  | 0.0372956 |
| P17156     | Hspa2      | heat shock protein 2                                          | -1.2601388 | 0.0334563 |
| Q05421     | Cyp2e1     | cytochrome P450, family 2, subfamily e, polypeptide 1         | -1.7277712 | 0.0138868 |
| Q99L88     | Sntb1      | syntrophin, basic 1                                           | -1.7360773 | 0.0226562 |
| A0A075B5W2 | A0A075B5W2 | NA                                                            | -1.7608901 | 0.0203786 |
| Q61285     | Abcd2      | ATP-binding cassette, sub-family D (ALD), member 2            | -1.839118  | 0.0195527 |
| O54774     | Ap3d1      | adaptor-related protein complex 3, delta 1 subunit            | -1.8997958 | 0.0396109 |
| A2AQ19     | Rtf1       | RTF1, Paf1/RNA polymerase II complex component                | -1.9711807 | 0.0352119 |
| P49290     | Epx        | eosinophil peroxidase                                         | -1.9920238 | 0.0296583 |
| P47941     | Crkl       | v-crk avian sarcoma virus CT10 oncogene homolog-like          | -1.9991506 | 0.0304495 |
| P10493     | Nid1       | nidogen 1                                                     | -2.0428692 | 0.0427194 |
| Q99P88     | Nup155     | nucleoporin 155                                               | -2.2311486 | 0.0339595 |
| P58871     | Tnks1bp1   | tankyrase 1 binding protein 1                                 | -2.2940625 | 0.016422  |
| Q9Z1M8     | Ik         | IK cytokine                                                   | -2.3099211 | 0.0136874 |
| P05064     | Aldoa      | aldolase A, fructose-bisphosphate                             | -2.32745   | 0.0386861 |
| Q04857     | Col6a1     | collagen, type VI, alpha 1                                    | -2.4355212 | 0.0288081 |
| O88322     | Nid2       | nidogen 2                                                     | -2.4890993 | 0.0459355 |
| Q8CGB6     | Tns2       | tensin 2                                                      | -2.8493697 | 0.0203617 |
| C0HKD9     | Mfap1a     | microfibrillar-associated protein 1A                          | -2.9606212 | 0.0155524 |
| Q61554     | Fbn1       | fibrillin 1                                                   | -3.5268239 | 0.0390791 |
| P25444     | Rps2       | ribosomal protein S2                                          | -3.6854786 | 0.0378189 |
| Q91VM5     | Rbmx1      | RNA binding motif protein, X-linked like-1                    | -4.0708897 | 0.0450577 |
| Q80XU3     | Nucks1     | nuclear casein kinase and cyclin-dependent kinase substrate 1 | -4.4330545 | 0.0124721 |

Comparison of fat samples with CK2 $\alpha$  immunoprecipitations between distilled water- and MOTS-c administered mice (iPvalue < 0.05).

**Supplemental-Table 12. Summary of human studies**

| Cohort                          | Outcome                                                           | Related Figure/table                | Final sample number (n) | Female (%) | Number of m.1382A>C carriers (n, A/C allele) |
|---------------------------------|-------------------------------------------------------------------|-------------------------------------|-------------------------|------------|----------------------------------------------|
| Skeletal muscle gene expression | RNA sequencing                                                    | Figure 6A-D, S-Table 13-15          | 48                      | 52.1       | 43/5                                         |
| WASEDA'S Health Study           | Sarcopenia risk* and ASMI by physical activity levels             | Figure 6E-G, S-Tables 16-18         | 1241                    | 33.4       | 1144/97                                      |
| J-MICC (1st, baseline)          | Prevalence of type 2 diabetes by age and physical activity levels | Figure 6H-J, S-Tables 19-20, and 22 | 11,853                  | 58.1       | 10,959/894                                   |
| J-MICC (2nd, 5 years later)     | Skeletal muscle mass index and grip strength by age               | S-Figure 13, S-Table 21             | 8226 <sup>†</sup>       | 59.9       | 7596/630                                     |

ASMI: appendicular skeletal muscle index

\*: Sarcopenia risk is assessed by ASMI <7.0 kg/m<sup>2</sup> for men and <5.4 kg/m<sup>2</sup> for women.

†: 8132 subjects had all the data for skeletal muscle mass index analysis.

**Supplemental-Table 13. Characteristics of participants according to MOTS-c m.1382A>C in skeletal muscle gene expression cohort**

| MOTS-c m.1382A>C | All           |     |              |     | Men           |     |              |     | Women         |     |              |    |
|------------------|---------------|-----|--------------|-----|---------------|-----|--------------|-----|---------------|-----|--------------|----|
|                  | A<br>(n = 43) |     | C<br>(N = 5) |     | A<br>(n = 19) |     | C<br>(N = 4) |     | A<br>(n = 24) |     | C<br>(N = 1) |    |
| Variables        | Mean          | SD  | Mean         | SD  | Mean          | SD  | Mean         | SD  | Mean          | SD  | Mean         | SD |
| Women (%)        | 55.8          |     | 20.0         |     |               |     |              |     |               |     |              |    |
| Age (year)       | 25.7          | 7.5 | 24.0         | 4.7 | 26.6          | 8.2 | 24.8         | 5.1 | 24.9          | 7.0 | 21.0         | -  |

Mean ± SD.

**Supplemental-Table 15. Significant enriched KEGG pathways in Japanese carriers of the m.1382A>C polymorphism: Comparison of A (WT) or C (K14Q) allele carriers**

| Term ID  | Description                                      | LogP         |
|----------|--------------------------------------------------|--------------|
| hsa04510 | Focal adhesion                                   | -12.0542851  |
| hsa04512 | ECM-receptor interaction                         | -7.338889399 |
| hsa04151 | PI3K-Akt signaling pathway                       | -4.352705587 |
| hsa05165 | Human papillomavirus infection                   | -3.890558594 |
| hsa05222 | Small cell lung cancer                           | -2.711754969 |
| hsa05146 | Amoebiasis                                       | -2.548784624 |
| hsa05145 | Toxoplasmosis                                    | -2.416957717 |
| hsa05133 | Pertussis                                        | -4.117399707 |
| hsa04610 | Complement and coagulation cascades              | -2.819450524 |
| hsa05171 | Coronavirus disease - COVID-19                   | -2.651222387 |
| hsa05322 | Systemic lupus erythematosus                     | -2.096301118 |
| hsa04974 | Protein digestion and absorption                 | -3.495588834 |
| hsa04360 | Axon guidance                                    | -4.052544011 |
| hsa05100 | Bacterial invasion of epithelial cells           | -2.007459924 |
| hsa05131 | Shigellosis                                      | -4.032724478 |
| hsa04210 | Apoptosis                                        | -2.947123529 |
| hsa05135 | Yersinia infection                               | -2.93295888  |
| hsa04750 | Inflammatory mediator regulation of TRP channels | -2.61170303  |
| hsa05415 | Diabetic cardiomyopathy                          | -2.198824706 |
| hsa04664 | Fc epsilon RI signaling pathway                  | -2.155513301 |
| hsa05417 | Lipid and atherosclerosis                        | -2.096457221 |

**Supplemental-Table 16. Characteristics of participants according to MOTS-c m.1382A>C in WASEDA'S Health Study**

| MOTS-c<br>m.1382A>C       | All             |      |               |      | Men            |      |               |      | Women          |      |               |      | P-value             |                  |             |
|---------------------------|-----------------|------|---------------|------|----------------|------|---------------|------|----------------|------|---------------|------|---------------------|------------------|-------------|
|                           | A<br>(n = 1144) |      | C<br>(N = 97) |      | A<br>(n = 763) |      | C<br>(N = 64) |      | A<br>(n = 381) |      | C<br>(N = 33) |      | MOTS-c<br>m.1382A>C | Sex              | Interaction |
| Variables                 | Mean            | SD   | Mean          | SD   | Mean           | SD   | Mean          | SD   | Mean           | SD   | Mean          | SD   |                     |                  |             |
| Women (%)                 | 33.3            |      | 34.0          |      |                |      |               |      |                |      |               |      | 0.644               | NA               | NA          |
| Age (year)                | 55.2            | 9.9  | 56.6          | 10.2 | 56.9           | 10.3 | 59.1          | 10.8 | 52.0           | 8.4  | 51.7          | 6.9  | 0.375               | <b>&lt;0.001</b> | 0.222       |
| Height (cm)               | 166.5           | 7.8  | 166.4         | 8.2  | 170.3          | 5.8  | 170.6         | 6.0  | 158.9          | 5.3  | 158.3         | 5.2  | 0.948               | <b>&lt;0.001</b> | 0.235       |
| Body weight (kg)          | 63.9            | 11.4 | 63.5          | 11.7 | 68.8           | 9.5  | 68.6          | 10.1 | 54.0           | 7.6  | 53.7          | 7.9  | 0.894               | <b>&lt;0.001</b> | 0.873       |
| BMI (kg/m <sup>2</sup> )  | 22.9            | 3.1  | 22.8          | 3.0  | 23.7           | 2.9  | 23.5          | 2.9  | 21.4           | 2.9  | 21.5          | 2.9  | 0.853               | <b>&lt;0.001</b> | 0.678       |
| ASMI (kg/m <sup>2</sup> ) | 7.32            | 1.16 | 7.23          | 1.17 | 7.94           | 0.81 | 7.85          | 0.83 | 6.09           | 0.68 | 6.04          | 0.71 | 0.471               | <b>&lt;0.001</b> | 0.963       |
| ASM (kg)                  | 20.5            | 4.5  | 20.2          | 4.6  | 23.1           | 2.9  | 22.9          | 3.0  | 15.4           | 2.0  | 15.1          | 2.1  | 0.594               | <b>&lt;0.001</b> | 0.643       |
| MVPA (min/week)           | 371             | 380  | 412           | 407  | 384            | 360  | 476           | 465  | 346            | 418  | 287           | 215  | 0.809               | 0.087            | 0.114       |
| Low muscle mass<br>(%)*   | 11.4            |      | 18.6          |      | 10.1           |      | 17.2          |      | 13.9           |      | 21.2          |      | <b>0.043</b>        | <b>0.032</b>     | 0.889       |

ASM, appendicular skeletal muscle mass; ASMI, appendicular skeletal muscle mass index; BMI, body mass index; MVPA, moderate to vigorous intensity physical activity.

Data were analyzed by two-way ANCOVA (MOTS-c m.1382A>C × sex) adjusted for age for continuous variables or logistic regression analysis (MOTS-c m.1382A>C × sex) adjusted for age for categorical variables.

\*ASMI <7.0 kg/m<sup>2</sup> for men and <5.4 kg/m<sup>2</sup> for women.

Mean ± SD.

**Supplemental-Table 17. Odds ratios for the prevalence of low muscle mass according to MOT-c m.1382A>C and MVPA group**

| Variables                     | OR (95% CI)       | P-value      |
|-------------------------------|-------------------|--------------|
| <b><i>All subjects</i></b>    |                   |              |
| MOTS-c m.1382A>C (C allele)   | 1.75 (1.01, 3.02) | <b>0.044</b> |
| MVPA group (high MVPA group)  | 0.72 (0.49, 1.06) | 0.094        |
| <b><i>Male subjects</i></b>   |                   |              |
| MOTS-c m.1382A>C (C allele)   | 1.76 (0.88, 3.52) | 0.112        |
| MVPA group (high MVPA group)  | 0.92 (0.53, 1.59) | 0.764        |
| <b><i>Female subjects</i></b> |                   |              |
| MOTS-c m.1382A>C (C allele)   | 1.72 (0.70, 4.19) | 0.236        |
| MVPA group (high MVPA group)  | 0.55 (0.31, 0.97) | <b>0.039</b> |

Model was adjusted for age and sex



**Supplemental-Table 18. Characteristics of participants according to MOTS-c m.1382A>C and MVPA group in WASEDA'S Health Study**

| MVPA group                    | Low (<150 min/week) |      |               |      | High (≥150 min/week) |      |               |      | P-value             |            |             |
|-------------------------------|---------------------|------|---------------|------|----------------------|------|---------------|------|---------------------|------------|-------------|
|                               | A<br>(n = 281)      |      | C<br>(N = 25) |      | A<br>(n = 863)       |      | C<br>(N = 72) |      | MOTS-c<br>m.1382A>C | MVPA group | Interaction |
| MOTS-c m.1382A>C              | Mean                | SD   | Mean          | SD   | Mean                 | SD   | Mean          | SD   |                     |            |             |
| <b><i>All subjects</i></b>    |                     |      |               |      |                      |      |               |      |                     |            |             |
| Women (%)                     | 42.7                |      | 36            |      | 30.2                 |      | 33.3          |      | 0.664               | 0.017      | 0.391       |
| Age (year)                    | 52.4                | 9.1  | 54.0          | 10.9 | 56.2                 | 10.0 | 57.5          | 9.9  | 0.236               | 0.004      | 0.939       |
| Height (cm)                   | 165.5               | 8.2  | 165.3         | 8.8  | 166.9                | 7.6  | 166.7         | 7.9  | 0.907               | 0.067      | 0.377       |
| Body weight (kg)              | 63.8                | 12.7 | 61.5          | 11.6 | 63.9                 | 10.9 | 64.2          | 11.8 | 0.309               | 0.504      | 0.058       |
| BMI (kg/m <sup>2</sup> )      | 23.2                | 3.7  | 22.3          | 2.7  | 22.9                 | 2.9  | 23.0          | 3.2  | 0.239               | 0.887      | 0.081       |
| ASM (kg)                      | 19.9 <sup>†</sup>   | 4.8  | 19.2          | 4.9  | 20.7                 | 4.4  | 20.6          | 4.4  | 0.173               | 0.013      | 0.035       |
| ASMI (kg/m <sup>2</sup> )     | 7.19 <sup>†</sup>   | 1.28 | 6.94          | 1.25 | 7.37                 | 1.12 | 7.33          | 1.13 | 0.089               | 0.045      | 0.034       |
| MVPA (min/week)               | 59                  | 49   | 51            | 45   | 473                  | 386  | 537           | 402  | 0.589               | <0.001     | 0.370       |
| Low muscle mass (%)*          | 13.9                |      | 24.0          |      | 10.5                 |      | 16.7          |      | 0.044               | 0.094      | 0.764       |
| <b><i>Male subjects</i></b>   |                     |      |               |      |                      |      |               |      |                     |            |             |
| Age (year)                    | 53.7                | 9.7  | 57.1          | 11.7 | 57.7                 | 10.3 | 59.8          | 10.5 | 0.073               | 0.031      | 0.665       |
| Height (cm)                   | 170.5               | 6.2  | 169.8         | 6.8  | 170.3                | 5.7  | 170.8         | 5.7  | 0.584               | 0.211      | 0.561       |
| Body weight (kg)              | 70.3                | 10.9 | 67.5          | 9.7  | 68.5                 | 9.1  | 68.9          | 10.3 | 0.595               | 0.828      | 0.278       |
| BMI (kg/m <sup>2</sup> )      | 24.2                | 3.5  | 23.3          | 2.5  | 23.6                 | 2.7  | 23.6          | 3.0  | 0.337               | 0.715      | 0.329       |
| ASM (kg)                      | 23.3                | 3.2  | 22.3          | 3.2  | 23.0                 | 2.9  | 23.1          | 3.0  | 0.609               | 0.200      | 0.283       |
| ASMI (kg/m <sup>2</sup> )     | 8.00                | 0.92 | 7.71          | 0.78 | 7.92                 | 0.78 | 7.89          | 0.85 | 0.317               | 0.405      | 0.316       |
| MVPA (min/week)               | 66                  | 49   | 52            | 45   | 469                  | 359  | 617           | 456  | 0.297               | <0.001     | 0.081       |
| Low muscle mass (%)*          | 9.9                 |      | 18.8          |      | 10.1                 |      | 16.7          |      | 0.112               | 0.764      | 0.870       |
| <b><i>Female subjects</i></b> |                     |      |               |      |                      |      |               |      |                     |            |             |
| Age (year)                    | 50.6                | 8.0  | 48.3          | 6.6  | 52.7                 | 8.4  | 52.9          | 6.7  | 0.546               | 0.045      | 0.462       |
| Height (cm)                   | 158.7               | 5    | 157.4         | 5.9  | 159                  | 5.4  | 158.6         | 4.9  | 0.283               | 0.160      | 0.502       |
| Body weight (kg)              | 55.1                | 9.2  | 50.9          | 4.9  | 53.5                 | 6.8  | 54.8          | 8.6  | 0.336               | 0.375      | 0.068       |
| BMI (kg/m <sup>2</sup> )      | 21.9                | 3.5  | 20.6          | 1.9  | 21.2                 | 2.5  | 21.8          | 3.1  | 0.605               | 0.818      | 0.114       |
| ASM (kg)                      | 15.4 <sup>†</sup>   | 2.2  | 13.8          | 1.4  | 15.4                 | 1.9  | 15.6          | 2.1  | 0.074               | 0.005      | 0.017       |
| ASMI (kg/m <sup>2</sup> )     | 6.09 <sup>†</sup>   | 0.77 | 5.58          | 0.56 | 6.09                 | 0.63 | 6.21          | 0.69 | 0.143               | 0.018      | 0.019       |
| MVPA (min/week)               | 51                  | 48   | 48            | 49   | 482                  | 442  | 377           | 180  | 0.440               | <0.001     | 0.503       |
| Low muscle mass (%)*          | 19.2                |      | 33.3          |      | 11.5                 |      | 16.7          |      | 0.236               | 0.039      | 0.772       |

---

ASM, appendicular skeletal muscle mass; ASMI, appendicular skeletal muscle mass index; BMI, body mass index; MVPA, moderate to vigorous intensity physical activity.

Data were analyzed by two-way ANCOVA (MOTS-c m.1382A>C × MVPA group) adjusted for age and sex for continuous variables or logistic regression analysis adjusted for age and sex for categorical variables.

\*ASMI <7.0 kg/m<sup>2</sup> for men and <5.4 kg/m<sup>2</sup> for women.

†vs. C allele in the same MVPA group.

Mean ± SD.

**Supplemental-Table 19. Characteristics of subjects in Saga area of J-MICC Study (1st study) by age groups.**

| Age groups<br>m.1382A/C           | 40s   |     |       |     |       | 50s   |     |       |     |       | 60s   |      |       |      |       |
|-----------------------------------|-------|-----|-------|-----|-------|-------|-----|-------|-----|-------|-------|------|-------|------|-------|
|                                   | A     |     | C     |     | P     | A     |     | C     |     | P     | A     |      | C     |      | P     |
|                                   | Mean  | SD  | Mean  | SD  |       | Mean  | SD  | Mean  | SD  |       | Mean  | SD   | Mean  | SD   |       |
| <b><u>Male subjects</u></b>       |       |     |       |     |       |       |     |       |     |       |       |      |       |      |       |
| (n)                               | 1029  |     | 95    |     |       | 1,676 |     | 128   |     |       | 1,898 |      | 137   |      |       |
| Age (years old)                   | 44.7  | 2.7 | 44.4  | 2.8 | 0.295 | 54.9  | 2.8 | 54.6  | 2.9 | 0.234 | 64.5  | ±2.8 | 64.8  | 2.9  | 0.352 |
| Height (cm)                       | 170.3 | 5.7 | 170.4 | 5.3 | 0.859 | 167.5 | 5.5 | 167.9 | 4.9 | 0.393 | 164.7 | ±5.7 | 164.6 | 5.3  | 0.870 |
| BMI (kg/m <sup>2</sup> )          | 24.3  | 3.2 | 24.7  | 3.5 | 0.246 | 24.3  | 3.0 | 24.4  | 3.2 | 0.697 | 24.1  | ±2.8 | 23.8  | 3.2  | 0.208 |
| Waist circumference (cm)          | 85.3  | 8.2 | 85.7  | 9.3 | 0.675 | 86.4  | 7.8 | 86.4  | 8.6 | 0.981 | 86.6  | ±7.8 | 85.7  | 8.4  | 0.227 |
| Smokers (%)                       | 46.2% |     | 48.4% |     | 0.376 | 39.1% |     | 39.8% |     | 0.473 | 26.9% |      | 30.7% |      | 0.197 |
| MVPA (min/day)                    | 22.5  | 0.5 | 23.3  | 1.9 | 0.692 | 21.8  | 0.4 | 20.6  | 1.2 | 0.355 | 21.0  | ±0.4 | 22.8  | 2.4  | 0.452 |
| Prevalence of type 2 diabetes (%) | 5.3%  |     | 5.3%  |     | 0.603 | 10.4% |     | 7.8%  |     | 0.224 | 14.2% |      | 23.4% |      | 0.004 |
| <b><u>Female subjects</u></b>     |       |     |       |     |       |       |     |       |     |       |       |      |       |      |       |
| (n)                               | 1695  |     | 136   |     |       | 2,335 |     | 192   |     |       | 2,326 |      | 206   |      |       |
| Age (years old)                   | 44.6  | 2.8 | 44.7  | 2.9 | 0.815 | 54.9  | 2.8 | 54.6  | 3.0 | 0.227 | 64.3  | 2.7  | 64.4  | 2.9  | 0.685 |
| Height (cm)                       | 157.3 | 5.1 | 157.8 | 5.6 | 0.289 | 155.0 | 4.9 | 154.8 | 5.1 | 0.673 | 152.1 | 4.9  | 151.9 | 5.0  | 0.640 |
| BMI (kg/m <sup>2</sup> )          | 22.1  | 3.2 | 22.3  | 3.2 | 0.583 | 22.7  | 3.1 | 22.7  | 3.4 | 0.860 | 23.2  | 3.2  | 23.5  | 3.4  | 0.328 |
| Waist circumference (cm)          | 77.7  | 8.8 | 79.0  | 8.7 | 0.082 | 81.0  | 9.1 | 80.6  | 9.9 | 0.482 | 83.9  | 9.3  | 83.7  | 10.0 | 0.757 |
| Smokers (%)                       | 10.9% |     | 14.7% |     | 0.111 | 10.4% |     | 11.5% |     | 0.353 | 4.4%  |      | 3.9%  |      | 0.460 |
| MVPA (min/day)                    | 19.4  | 0.3 | 18.5  | 1.0 | 0.358 | 19.6  | 0.3 | 18.8  | 0.9 | 0.393 | 17.5  | 0.3  | 16.1  | 1.0  | 0.145 |
| Prevalence of type 2 diabetes (%) | 1.4%  |     | 0.7%  |     | 0.458 | 4.5%  |     | 1.6%  |     | 0.029 | 7.3%  |      | 7.8%  |      | 0.446 |

BMI, body mass index. MVPA, moderate to vigorous physical activity. Mean ± SD.

**Supplemental-Table 20. Statistical Model Analysis of Type 2 Diabetes Risk Based on Interaction of Multiple Factors among Subjects in the Saga Area of the J-MICC Study (1st Study).**

| Model          | Variables                    | Coefficient | Standard error | Confidence interval | P                | Adjusted R <sup>2</sup> | AIC    |
|----------------|------------------------------|-------------|----------------|---------------------|------------------|-------------------------|--------|
| <b>Model 1</b> |                              |             |                |                     |                  | 0                       | 1706.0 |
|                | Intercept                    | 0.073       | 0.0024         | 0.068, 0.078        | <b>&lt;0.001</b> |                         |        |
|                | MOTS-c m.1382A>C             | 0.003       | 0.0090         | -0.016, 0.020       | 0.806            |                         |        |
| <b>Model 2</b> |                              |             |                |                     |                  | 0.030                   | 1349.9 |
|                | Intercept                    | -0.160      | 0.0250         | -0.209, -0.110      | <b>&lt;0.001</b> |                         |        |
|                | Age                          | 0.005       | 0.0004         | 0.004, 0.006        | <b>&lt;0.001</b> |                         |        |
|                | Sex                          | 0.030       | 0.0330         | -0.034, 0.095       | 0.356            |                         |        |
|                | Age * Sex                    | -0.002      | 0.0006         | -0.003, -0.004      | <b>0.005</b>     |                         |        |
| <b>Model 3</b> |                              |             |                |                     |                  | 0.030                   | 1350.7 |
|                | Intercept                    | -0.149      | 0.0425         | -0.232, -0.066      | <b>&lt;0.001</b> |                         |        |
|                | Age                          | 0.005       | 0.0007         | 0.003, 0.006        | <b>&lt;0.001</b> |                         |        |
|                | Sex                          | 0.046       | 0.0567         | -0.066, 0.157       | 0.422            |                         |        |
|                | MVPA                         | 0.000       | 0.0015         | -0.003, 0.003       | <b>0.761</b>     |                         |        |
|                | Age * Sex                    | -0.002      | 0.0010         | -0.0040, -0.0002    | <b>0.033</b>     |                         |        |
|                | Age * MVPA                   | 0.00001     | 0.000026       | -0.00004, 0.00006   | 0.804            |                         |        |
|                | Sex * MVPA                   | -0.001      | 0.0023         | -0.006, 0.003       | 0.624            |                         |        |
|                | Age * Sex * MVPA             | 0.000030    | 0.000040       | -0.00005, 0.00011   | 0.437            |                         |        |
| <b>Model 4</b> |                              |             |                |                     |                  | 0.030                   | 1345.4 |
|                | Intercept                    | -0.142      | 0.0265         | -0.194, -0.090      | <b>&lt;0.001</b> |                         |        |
|                | Age                          | 0.004       | 0.0005         | -0.416, -0.053      | <b>&lt;0.001</b> |                         |        |
|                | Sex                          | 0.015       | 0.0344         | 0.004, 0.005        | 0.654            |                         |        |
|                | MOTS-c m.1382A>C             | -0.235      | 0.0927         | -0.052, 0.083       | <b>0.011</b>     |                         |        |
|                | Age * Sex                    | -0.001      | 0.0006         | 0.001, 0.008        | <b>0.032</b>     |                         |        |
|                | MOTS-c m.1382A>C * Age       | 0.005       | 0.0016         | -0.043, 0.434       | <b>0.004</b>     |                         |        |
|                | MOTS-c m.1382A>C * Sex       | 0.195       | 0.1215         | -0.002, 0.0001      | 0.108            |                         |        |
|                | MOTS-c m.1382A>C * Age * Sex | -0.004      | 0.0022         | -0.008, 0.00007     | 0.054            |                         |        |
| <b>Model 5</b> |                              |             |                |                     |                  | 0.032                   | 1336.7 |

|                                     |           |         |                   |                  |
|-------------------------------------|-----------|---------|-------------------|------------------|
| Intercept                           | -0.096    | 0.045   | -0.184, -0.008    | <b>0.032</b>     |
| Age                                 | 0.004     | 0.001   | 0.002, 0.005      | <b>&lt;0.001</b> |
| Sex                                 | -0.004    | 0.060   | -0.121, 0.112     | 0.941            |
| MVPA                                | -0.002    | 0.002   | -0.005, 0.001     | 0.204            |
| MOTS-c m.1382A>C                    | -0.498    | 0.142   | -0.776, -0.220    | <b>&lt;0.001</b> |
| Age * Sex                           | -0.001    | 0.001   | -0.003, 0.001     | 0.283            |
| Age * MVPA                          | 0.00004   | 0.00003 | -0.00002, 0.00009 | 0.177            |
| Sex * MVPA                          | 0.001     | 0.002   | -0.004, 0.005     | 0.831            |
| MOTS-c m.1382A>C * Age              | 0.010     | 0.002   | 0.005, 0.015      | <b>&lt;0.001</b> |
| MOTS-c m.1382A>C * Sex              | 0.468     | 0.197   | 0.081, 0.854      | <b>0.018</b>     |
| MOTS-c m.1382A>C * MVPA             | 0.012     | 0.005   | 0.002, 0.021      | <b>0.015</b>     |
| Age * Sex * MVPA                    | -0.000001 | 0.00004 | -0.0001, 0.0001   | 0.983            |
| MOTS-c m.1382A>C * Age * Sex        | -0.009    | 0.003   | -0.016, -0.003    | <b>0.005</b>     |
| MOTS-c m.1382A>C * Age * MVPA       | -0.0002   | 0.0001  | -0.0004, -0.0001  | <b>0.004</b>     |
| MOTS-c m.1382A>C * Sex * MVPA       | -0.013    | 0.008   | -0.028, 0.003     | 0.124            |
| MOTS-c m.1382A>C * Age * Sex * MVPA | 0.0002    | 0.0001  | -0.00003, 0.0005  | 0.081            |

---

AIC, akaike information criterion. MVPA, moderate to vigorous physical activity (min/day).

**Supplemental-Table 21. Skeletal muscle mass index and grip strength of subjects in Saga area of J-MICC Study (2nd study) by m.1382A>C polymorphism divided with age groups.**

| Age groups                                      | 40-49 years at baseline<br>(45-54 years at the 2nd survey) |      |      |      |       | 50-59 years at baseline<br>(55-64 years at the 2nd survey) |      |      |      |       | 60-69 years at baseline<br>(65-74 years at the 2nd survey) |      |      |      |       |
|-------------------------------------------------|------------------------------------------------------------|------|------|------|-------|------------------------------------------------------------|------|------|------|-------|------------------------------------------------------------|------|------|------|-------|
|                                                 | A                                                          |      | C    |      | P     | A                                                          |      | C    |      | P     | A                                                          |      | C    |      | P     |
| m.1382 A/C                                      | Mean                                                       | SE   | Mean | SE   |       | Mean                                                       | SE   | Mean | SE   |       | Mean                                                       | SE   | Mean | SE   |       |
| <b><i>Male subjects</i></b>                     |                                                            |      |      |      |       |                                                            |      |      |      |       |                                                            |      |      |      |       |
|                                                 | 632                                                        |      | 54   |      |       | 1162                                                       |      | 92   |      |       | 1344                                                       |      | 98   |      |       |
| Skeletal muscle mass index (kg/m <sup>2</sup> ) | 7.68                                                       | 0.01 | 7.73 | 0.03 | 0.179 | 7.14                                                       | 0.01 | 7.16 | 0.02 | 0.422 | 6.55                                                       | 0.10 | 6.49 | 0.02 | 0.011 |
| Grip strength (kg)                              | 41.3                                                       | 0.2  | 42.6 | 0.8  | 0.110 | 38.6                                                       | 0.2  | 38.9 | 0.6  | 0.615 | 34.9                                                       | 0.1  | 33.9 | 0.5  | 0.076 |
| <b><i>Female subjects</i></b>                   |                                                            |      |      |      |       |                                                            |      |      |      |       |                                                            |      |      |      |       |
| N                                               | 1165                                                       |      | 95   |      |       | 1646                                                       |      | 144  |      |       | 1647                                                       |      | 147  |      |       |
| Skeletal muscle mass index (kg/m <sup>2</sup> ) | 7.16                                                       | 0.01 | 7.15 | 0.02 | 0.847 | 6.67                                                       | 0.01 | 6.71 | 0.02 | 0.061 | 6.21                                                       | 0.01 | 6.21 | 0.02 | 0.968 |
| Grip strength (kg)                              | 25.5                                                       | 0.1  | 26.0 | 0.4  | 0.266 | 23.5                                                       | 0.1  | 23.7 | 0.3  | 0.669 | 22.0                                                       | 0.1  | 22.3 | 0.3  | 0.303 |

Mean ± SE. Values are adjusted by body mass index (BMI) and moderate-to-vigorous intensity physical activity (MVPA).

**Supplemental-Table 22. Characteristics of subjects in Saga area of J-MICC Study (1st study) by physical activity levels in 60s**

| MVPA (min/week)<br>MOTS-c 1382C>A | Low (<150 min/week) |     |       |     |        | High (≥150 min/week) |     |       |      |       |
|-----------------------------------|---------------------|-----|-------|-----|--------|----------------------|-----|-------|------|-------|
|                                   | A                   |     | C     |     | P      | A                    |     | C     |      | P     |
| <b><i>Male subjects</i></b>       | Mean                | SE  | Mean  | SE  |        | Mean                 | SE  | Mean  | SE   |       |
| n                                 | 1211                |     | 89    |     |        | 687                  |     | 48    |      |       |
| Age (years)                       | 64.6                | 0.1 | 64.7  | 0.3 | 0.614  | 64.5                 | 0.1 | 64.8  | 0.4  | 0.379 |
| Height (cm)                       | 164.9               | 0.2 | 164.3 | 0.6 | 0.319  | 164.2                | 0.2 | 165.1 | 0.8  | 0.275 |
| BMI (kg/m <sup>2</sup> )          | 24.1                | 0.1 | 23.9  | 0.4 | 0.447  | 24.0                 | 0.1 | 23.6  | 0.4  | 0.254 |
| Body fat (%)                      | 23.1                | 0.1 | 23.1  | 0.5 | 0.872  | 22.1                 | 0.2 | 22.0  | 0.6  | 0.847 |
| MVPA (min/week)                   | 70.0                | 1.2 | 60.8  | 4.4 | 0.037  | 282.4                | 5.1 | 343.2 | 33.8 | 0.082 |
| Smokers (%)                       | 31.3                |     | 33.7  |     | 0.637  | 19.2                 |     | 25    |      | 0.347 |
| Type 2 diabetes (%)               | 13.5                |     | 31.5  |     | <0.001 | 15.4                 |     | 8.3   |      | 0.214 |
| <b><i>Female subjects</i></b>     |                     |     |       |     |        |                      |     |       |      |       |
| n                                 | 1662                |     | 155   |     |        | 664                  |     | 51    |      |       |
| Age (years)                       | 64.4                | 0.1 | 64.4  | 0.2 | 0.913  | 63.9                 | 0.1 | 64.1  | 0.4  | 0.653 |
| Height (cm)                       | 152.4               | 0.1 | 152.1 | 0.4 | 0.476  | 151.5                | 0.2 | 151.6 | 0.6  | 0.899 |
| BMI (kg/m <sup>2</sup> )          | 23.2                | 0.1 | 23.5  | 0.3 | 0.393  | 23.2                 | 0.1 | 23.4  | 0.4  | 0.647 |
| Body fat (%)                      | 32.7                | 0.1 | 32.9  | 0.5 | 0.645  | 32.4                 | 0.2 | 32.3  | 0.8  | 0.819 |
| MVPA (min/week)                   | 72.6                | 0.9 | 67.3  | 3.0 | 0.095  | 248.5                | 3.8 | 250.1 | 12.5 | 0.908 |
| Smokers (%)                       | 4.8                 |     | 5.2   |     | 0.844  | 3.3                  |     | 0     |      | 0.392 |
| Type 2 diabetes (%)               | 6.5                 |     | 8.4   |     | 0.397  | 9.3                  |     | 5.9   |      | 0.612 |

Mean ± SE. BMI, body mass index. MVPA, moderate to vigorous physical activity.
